# Supplementary material for: Microvascular Remodeling and Endothelial Dysfunction Across the Post-COVID-19 Spectrum: A Prospective Observational Case-Control Study
Source: Research Square preprint supplement (doi:10.21203/rs.3.rs-8702908/v1), 2026-02-03
Supplement: Supplementary file 1 [file b6d5df40027c0947dc0a75be.pdf]

# Microvascular Remodeling and Endothelial Dysfunction Across the Post-COVID-19 Spectrum: A Prospective Observational Case-Control Study

Timon Wallraven<sup>1</sup>, Roman Günthner<sup>1</sup>, Isabelle Lethen<sup>1</sup>, Andrea Ribeiro<sup>1</sup>, Maciej Lech<sup>2</sup>, Frederike Cosima Oertel<sup>3,4,5</sup>, Lukas G. Reeß<sup>3</sup>, Bernhard Haller<sup>6</sup>, Lukas Streese<sup>7,8</sup>, Henner Hanssen<sup>9</sup>, Michael Wunderle<sup>1\*</sup> & Christoph Schmaderer<sup>1,10\*</sup>

<sup>1</sup>TUM School of Medicine and Health, Department of Nephrology, TUM University Hospital, Technical University of Munich, Munich, Germany

<sup>2</sup>Medical Clinic and Polyclinic IV, LMU University Hospital Munich, Munich, Germany

<sup>3</sup>Experimental and Clinical Research Center, Charité-Universitätsmedizin Berlin, Corporate Member of Freie Universität Berlin and Humboldt-Universität zu Berlin, and Max Delbrück Center for Molecular Medicine, Germany

<sup>4</sup>Einstein Center Digital Future Berlin, Berlin, Germany

<sup>5</sup>Department of Neurology, Charité-Universitätsmedizin Berlin, Corporate Member of Freie Universität Berlin and Humboldt-Universität zu Berlin, and Max Delbrück Center for Molecular Medicine, Germany

<sup>6</sup>TUM School of Medicine and Health, Institute for AI and Informatics in Medicine, TUM University Hospital, Technical University of Munich, Munich, Germany

<sup>7</sup>Faculty of Health Care, Therapeutic Sciences, Niederrhein University of Applied Sciences, Krefeld, Germany

<sup>8</sup>Department of Nephrology, Medical Faculty, University Hospital Düsseldorf, Heinrich-Heine-University Düsseldorf, Düsseldorf, Germany

<sup>9</sup>Department of Sport, Exercise and Health, Preventive Sports Medicine and Systems Physiology, University of Basel, Basel, Switzerland

<sup>10</sup>German Centre for Infection Research (DZIF), Partner Site Munich, Munich, Germany

\*Authors share senior authorship

Corresponding authors:

T. Wallraven; C. Schmaderer

| Dependent variable ME/CFS |             |             |                |
|---------------------------|-------------|-------------|----------------|
| Predictors                | Odds Ratios | CI          | p              |
| Transferrin               | 0.99        | 0.97 – 1.00 | <b>0.007**</b> |
| IL 6                      | 1.16        | 1.05 – 1.36 | <b>0.018*</b>  |
| Creatinikinas             | 1.00        | 0.99 – 1.00 | 0.429          |
| AVR                       | 0.00        | 0.00 – 0.01 | <b>0.001**</b> |
| Neutrophile               | 1.06        | 1.02 – 1.12 | <b>0.009**</b> |
| ICAM-1                    | 1.00        | 1.00 – 1.00 | <b>0.040*</b>  |
| Observations              | 173         |             |                |
| R <sup>2</sup> Tjur       | 0.23        |             |                |

**Supplementary Table 1** Multivariable logistic regression with ME/CFS status as the dependent variable. Results are shown as odds ratios (OR) with 95% confidence intervals (CI) and p-values. The model included arteriolar–venular ratio (AVR), interleukin-6 (IL-6), neutrophil percentage, creatine kinase (CK), intercellular adhesion molecule-1 (ICAM-1) and transferrin. Model fit is summarized by Tjur's R<sup>2</sup>. Statistical significance is indicated as: \*p < 0.05; \*\*p < 0.01; \*\*\*p < 0.001.

#### Data & Code Availability

| Description                                | Source/Repository                                         | Persistent ID / URL                         |
|--------------------------------------------|-----------------------------------------------------------|---------------------------------------------|
| Study registration (All Eyes on PCS Study) | ClinicalTrials.gov                                        | ClinicalTrials.gov:<br>NCT05635552          |
| Study registration (Citrate–Acetate Study) | ClinicalTrials.gov                                        | ClinicalTrials.gov:<br>NCT05635552          |
| Study registration (COMPLETE Study)        | ClinicalTrials.gov                                        | ClinicalTrials.gov:<br>NCT02745340          |
| Data availability                          | Available from corresponding author on reasonable request | Not publicly available (legal restrictions) |
| Code availability                          | Available from corresponding author on reasonable request |                                             |

#### Other

| Description                    | Source / Repository                    | Persistent ID / URL                                             |
|--------------------------------|----------------------------------------|-----------------------------------------------------------------|
| Dynamic Vessel Analyzer (DVA)  | Imedos Health GmbH (Jena, Germany)     | DVALight                                                        |
| Static Vessel Analyzer (SVA)   | Imedos Health GmbH (Jena, Germany)     | VesselMap                                                       |
| Retinal camera                 | Topcon (Tokyo, Japan)                  | TRC-NW8                                                         |
| Cytometric Bead Array platform | BD Biosciences (San Diego, CA, USA)    | CBA Flex System                                                 |
| Biomarker measurements         | BD Biosciences                         | CBA Flex Sets: IL-6, ICAM-1, VCAM-1, MCP-1, CCL-5, CXCL10, VEGF |
| Statistical software           | R Foundation for Statistical Computing | R version 4.2.1                                                 |
| Affinity publisher             |                                        | Version 2.5.5                                                   |

|                 |      |                                                                    |
|-----------------|------|--------------------------------------------------------------------|
| R packages used | CRAN | MatchIt; WeightIt; survey;<br>gtsummary; ggplot2;<br>pROC; corplot |
|-----------------|------|--------------------------------------------------------------------|

**Supplementary Table 2** Major Resources Table

**vFID as dependent variable**

| <i>Predictors</i>                             | <i>Estimates</i> | <i>CI</i>    | <i>p</i> |
|-----------------------------------------------|------------------|--------------|----------|
| PCS                                           | -0.70            | -1.42 – 0.01 | 0.054    |
| gender [male]                                 | -0.41            | -1.25 – 0.43 | 0.34     |
| <b>Post-COVID-19 Syndrome × gender [male]</b> | -0.23            | -1.70 – 1.23 | 0.75     |
| Observations                                  | 287              |              |          |
| R <sup>2</sup> / R <sup>2</sup> adjusted      | 0.026 / 0.016    |              |          |

**CRAE as dependent variable**

| <i>Predictors</i>                             | <i>Estimates</i> | <i>CI</i>      | <i>p</i>       |
|-----------------------------------------------|------------------|----------------|----------------|
| PCS                                           | -7.13            | -11.78 – -2.48 | <b>0.003**</b> |
| gender [male]                                 | -4.51            | -9.92 – 0.90   | 0.10           |
| <b>Post-COVID-19 Syndrome × gender [male]</b> | 3.09             | -6.22 – 12.41  | 0.51           |
| Observations                                  | 296              |                |                |
| R <sup>2</sup> / R <sup>2</sup> adjusted      | 0.041 / 0.031    |                |                |

**AVR as the dependent variable**

| <i>Predictors</i>                             | <i>Estimates</i> | <i>CI</i>     | <i>p</i>            |
|-----------------------------------------------|------------------|---------------|---------------------|
| PCS                                           | -0.03            | -0.05 – -0.01 | <b>&lt;0.001***</b> |
| gender [male]                                 | 0.00             | -0.02 – 0.02  | 0.92                |
| <b>Post-COVID-19 Syndrome × gender [male]</b> | 0.01             | -0.02 – 0.05  | 0.54                |
| Observations                                  | 296              |               |                     |
| R <sup>2</sup> / R <sup>2</sup> adjusted      | 0.049 / 0.039    |               |                     |

**Supplementary Table 3** Linear regression models examining the associations between Post-COVID-19 syndrome (PCS) and DVA parameter vFID and SVA parameters (CRAE and AVR). Models included sex (male vs female) and a PCS × sex interaction term to test for sex-specific effects. Estimates represent unstandardized regression coefficients with 95% confidence intervals (CI). Statistical significance is indicated as: \*p < 0.05; \*\*p < 0.01; \*\*\*p < 0.001.

| Baseline characteristics | NI<br>n = 96 | Recovered<br>n = 102 | Post-COVID-19<br>Syndrome<br>n = 102 | p-value             |
|--------------------------|--------------|----------------------|--------------------------------------|---------------------|
| Age, years, mean (±SD)   | 43.0 (±14.5) | 33.3 (±11.4)         | 41.9 (±11.6)                         | <b>&lt;0.001***</b> |

|                                                              |                  |                  |                  |                     |
|--------------------------------------------------------------|------------------|------------------|------------------|---------------------|
| Gender, female, n(%)                                         | 73<br>(76%)      | 73 (72%)         | 77 (75%)         | >0.9                |
| BMI, kg/m <sup>2</sup> , mean (±SD)                          | 23.2<br>(±3.7)   | 23.5<br>(±4.0)   | 24.5<br>(±4.8)   | 0.090               |
| RR <sub>syst</sub> <sup>1</sup> ,(mmHg), mean (±SD)          | 122.7<br>(±16.0) | 116.7<br>(±15.7) | 121.8<br>(±16.9) | <b>0.026*</b>       |
| <b>Cardiovascular Risk Factors</b>                           |                  |                  |                  |                     |
| Arterial Hypertension, n(%)                                  | 0 (0%)           | 5 (4.9%)         | 16 (16%)         | <b>&lt;0.001***</b> |
| Hypercholesterolemia, n(%)                                   | -                | 6 (5.9%)         | 22 (22%)         | <b>0.003*</b>       |
| Nicotine abuse, n(%)                                         | 11(11%)          | 14 (14%)         | 10 (9.8%)        | 0.7                 |
| Diabetes mellitus, n(%)                                      | 0 (0%)           | 0 (0%)           | 1 (1.0%)         | 0.4                 |
| <b>Acute SARS-CoV-2 infection</b>                            |                  |                  |                  |                     |
| Number of infections, n(%)                                   |                  |                  |                  | <b>&lt;0.001***</b> |
| 0                                                            | 96<br>(100%)     | 0 (0%)           | 0 (0%)           |                     |
| 1                                                            | 0 (0%)           | 62 (61%)         | 71 (70%)         |                     |
| 2                                                            | 0 (0%)           | 31 (30%)         | 29 (28%)         |                     |
| 3                                                            | 0 (0%)           | 8 (7.8%)         | 1 (1.0%)         |                     |
| 4                                                            | 0 (0%)           | 1 (1.0%)         | 1 (1.0%)         |                     |
| Severity of acute infection, n(%)<br>(WHO progression scale) |                  |                  |                  | <b>&lt;0.001***</b> |
| 0                                                            | -                | 1(1.0%)          | 0 (0%)           |                     |
| 1                                                            | -                | 9(8.8%)          | 1 (1.0%)         |                     |
| 2                                                            | -                | 81(79%)          | 61(60%)          |                     |
| 3                                                            | -                | 10(9.8%)         | 34(33%)          |                     |
| 4                                                            | -                | 0 (0%)           | 4 (3.9%)         |                     |
| 5                                                            | -                | 0 (0%)           | 1 (1.0%)         |                     |
| 6                                                            | -                | 0 (0%)           | 1 (1.0%)         |                     |

|                                       |                |                |                      |                     |
|---------------------------------------|----------------|----------------|----------------------|---------------------|
| 8                                     | -              | 1 (1.0%)       | 0 (0%)               |                     |
| SARS-CoV-2 variants, n(%)             |                |                |                      | <b>0.004**</b>      |
| alpha                                 | -              | 1 (1.0%)       | 7 (6.9%)             |                     |
| delta                                 | -              | 2 (2.0%)       | 13 (13%)             |                     |
| omicron                               | -              | 20 (20%)       | 19 (19%)             |                     |
| unknown                               | -              | 79 (77%)       | 63 (62%)             |                     |
| <b>PCS-related characteristics</b>    |                |                |                      |                     |
| Duration of PCS, days, median (IQR)   | 0.0 (0.0, 0.0) | 0.0 (0.0, 0.0) | 404.0 (291.0, 575.0) | -                   |
| Cumulative sick days, median (IQR)    | -              | 0.0 (0.0, 0.0) | 199.5 (44.0, 377.0)  | <b>&lt;0.001***</b> |
| Work loss during PCS, n(%)            | -              | 0 (0%)         | 16 (16%)             | <b>&lt;0.001***</b> |
| PCS Severity Score, mean (±SD)        | -              | 1.8 (5.9)      | 36.9 (10.6)          | <b>&lt;0.001***</b> |
| C19-YRS, mean (±SD)                   | -              | -              | 32.4 (14.0)          | -                   |
| GAD7, median (IQR)                    | -              | -              | 5.0 (2.0, 9.0)       | -                   |
| PHQ9, mean (±SD)                      | -              | -              | 10.4(4.3)            | -                   |
| FSS, median (IQR)                     | -              | 2.3 (1.6, 3.1) | 6.1 (5.1, 6.7)       | <b>&lt;0.001***</b> |
| EQ5DL-Index, median (IQR)             | -              | -              | 0.6 (0.3, 0.8)       | -                   |
| ME/CFS, n(%)                          | -              | 0 (0%)         | 62 (61%)             | -                   |
| <b>Comorbidities</b>                  |                |                |                      |                     |
| Depression, n(%)                      | -              | 10 (9.8%)      | 19 (19%)             | 0.2                 |
| Pre-existing mental conditions , n(%) | -              | 4 (4.0%)       | 8 (7.9%)             | 0.4                 |
| <b>Laboratory values</b>              |                |                |                      |                     |

|                                             |                          |                          |                          |                     |
|---------------------------------------------|--------------------------|--------------------------|--------------------------|---------------------|
| Leukocytes (G/L), mean ( $\pm$ SD)          | 6.0<br>( $\pm$ 1.5)      | 6.5<br>( $\pm$ 1.8)      | 6.7<br>( $\pm$ 1.8)      | 0.063               |
| Platelets (G/L), mean ( $\pm$ SD)           | -                        | 270.5<br>( $\pm$ 56.7)   | 288.4<br>( $\pm$ 63.0)   | <b>0.040*</b>       |
| Neutrophils (%), mean ( $\pm$ SD)           | -                        | 58.2<br>( $\pm$ 9.4)     | 62.5<br>( $\pm$ 8.4)     | <b>0.001**</b>      |
| Lymphocytes (%), mean ( $\pm$ SD)           | -                        | 30.5<br>( $\pm$ 9.0)     | 28.0<br>( $\pm$ 7.7)     | <b>0.041*</b>       |
| Monocytes (%), median (IQR)                 | -                        | 7.5 (6.0,<br>9.0)        | 7.0 (6.0,<br>8.0)        | 0.071               |
| Eosinophils (%), median (IQR)               | -                        | 2.0 (1.0,<br>3.0)        | 2.0 (1.0,<br>3.0)        | <b>0.028*</b>       |
| Total Cholesterol (mg/dL), mean (SD)        | 195.9<br>( $\pm$ 35.2)   | 182.4<br>( $\pm$ 36.0)   | 202.9<br>( $\pm$ 44.3)   | <b>0.002**</b>      |
| LDL (mg/dL), mean ( $\pm$ SD)               | 108.2<br>( $\pm$ 25.1)   | 107.3<br>( $\pm$ 34.4)   | 127.7<br>( $\pm$ 40.0)   | <b>0.001***</b>     |
| HDL (mg/dL), mean ( $\pm$ SD)               | 69.2<br>( $\pm$ 14.8)    | 62.6<br>( $\pm$ 15.3)    | 62.2<br>( $\pm$ 15.1)    | 0.057               |
| Hemoglobin (g/dL), mean ( $\pm$ SD)         | 14.5<br>( $\pm$ 1.5)     | 13.4<br>( $\pm$ 1.6)     | 13.8<br>( $\pm$ 1.3)     | <b>&lt;0.001***</b> |
| Hematocrit (%),mean ( $\pm$ SD)             | -                        | 39.8<br>( $\pm$ 3.2)     | 40.4<br>( $\pm$ 3.2)     | 0.2                 |
| Ferritin ( $\mu$ g/L), median (IQR)         | -                        | 58.5<br>(27.5,<br>106.0) | 78.0<br>(50.0,<br>152.0) | <b>0.008**</b>      |
| CRP(mg/dl), median (IQR)                    | 0.016<br>(0.02,<br>0.09) | 0.18<br>(0.10,<br>0.20)  | 0.22<br>(0.09,<br>0.20)  | <b>&lt;0.001***</b> |
| Transferrin (mg/dL), mean ( $\pm$ SD)       | -                        | 286.0<br>( $\pm$ 46.2)   | 260.9<br>( $\pm$ 33.2)   | <b>&lt;0.001***</b> |
| Transferrin Saturation (%),mean ( $\pm$ SD) | -                        | 27.8<br>( $\pm$ 12.6)    | 27.8<br>( $\pm$ 10.9)    | >0.9                |
| RDW-CV (%), median (IQR)                    | -                        | 12.6<br>(12.2,<br>13.2)  | 12.6<br>(12.1,<br>13.1)  | 0.3                 |
| MCHC (g/dL), mean ( $\pm$ SD)               | -                        | 34.0<br>( $\pm$ 1.2)     | 34.1<br>( $\pm$ 1.0)     | 0.5                 |

|                                     |   |                            |                            |                     |
|-------------------------------------|---|----------------------------|----------------------------|---------------------|
| D-Dimer (ng/mL), median (IQR)       | - | 237.0<br>(199.0,<br>330.0) | 227.0<br>(199.0,<br>387.0) | 0.7                 |
| aPTT (sec), mean (±SD)              | - | 29.4<br>(±3.2)             | 29.8<br>(±3.1)             | 0.4                 |
| LDH (U/L), mean (±SD)               | - | 177.4<br>(±30.7)           | 176.0<br>(±28.9)           | 0.7                 |
| Creatine Kinase (U/L), median (IQR) | - | 110.0<br>(75.0,<br>154.0)  | 81.5<br>(58.0,<br>102.0)   | <b>&lt;0.001***</b> |
| Total IgG (mg/dL), mean (±SD)       | - | 1,118.7<br>(±265.5)        | 1,081.1<br>(±204.4)        | 0.3                 |
| IgG1 (mg/dL), mean (±SD)            | - | 691.7<br>(±176.1)          | 669.5<br>(±137.3)          | 0.3                 |
| IgG2 (mg/dL), mean (±SD)            | - | 354.8<br>(±135.6)          | 357.4<br>(±113.8)          | 0.9                 |
| IgG3 (mg/dL), median (IQR)          | - | 31.0<br>(23.5,<br>40.4)    | 27.4<br>(19.5,<br>37.7)    | <b>0.021*</b>       |
| IgG4 (mg/dL), median (IQR)          | - | 55.8<br>(33.2,<br>82.2)    | 47.2<br>(25.9,<br>80.2)    | 0.4                 |
| TSH (mIU/L), median (IQR)           | - | 1.6 (1.2,<br>2.1)          | 1.4 (1.0,<br>2.0)          | 0.2                 |

**Supplementary Table 4** presents baseline demographic, clinical, and laboratory characteristics of the three study cohorts: Never infected (NI) controls, Recovered individuals, and patients with Post-COVID-19 Syndrome (PCS). Continuous variables are reported as mean (±SD) or median (Q1, Q3), depending on distribution, and categorical variables as n (%). Statistical comparisons across groups were performed using one-way ANOVA, the Kruskal–Wallis test, or Pearson's  $\chi^2$  test, as appropriate. Abbreviations: Never infected, NI; BMI, Body Mass Index; RR<sub>syst</sub>, Blood pressure before RVA<sup>1</sup>; C19-YRS, COVID-19 Yorkshire Rehabilitation Scale; PHQ-9, Patient Health Questionnaire-9; GAD-7, Generalized Anxiety Disorder-7; FSS, Fatigue Severity Scale; EQ-5D-5L, EuroQol 5-Dimension 5-Level index; ME/CFS, Myalgic Encephalomyelitis/Chronic Fatigue Syndrome; LDL, Low-Density Lipoprotein Cholesterol; HDL, High-Density Lipoprotein Cholesterol; LDH, Lactate Dehydrogenase; MCHC, Mean Corpuscular Hemoglobin Concentration; RDW-CV, Red Cell Distribution Width–Coefficient of Variation; TSH, Thyroid-Stimulating Hormone; aPTT, Activated Partial Thromboplastin Time; CK, Creatine Kinase; IgG, Immunoglobulin G; IgG1–4, Immunoglobulin G subclasses 1–4. Missing data are reported as number of missing observations (n) for each group in the following order: NI, recovered, and PCS. Missing values were as follows: systolic blood pressure before RVA (RR<sub>syst</sub> ; 2, 11, 7); hypercholesterolemia (90, 0, 0); work loss during PCS (96, 0, 2); PCS Severity Score (90, 3, 0); C19-YRS score (96, 102, 1); PHQ-9 and GAD-7 (96, 102, 2); Fatigue Severity Scale (96, 5, 1); EQ-5D-5L index (96, 102, 57); ME/CFS status (-, 0, 1); depression diagnosis (96, 0, 0); pre-existing mental conditions (96, 1, 1); leukocytes (50, 8, 4); CRP (62, 7, 3); neutrophils (96, 12, 7); lymphocytes (96, 8, 4); monocytes (96, 8, 4); eosinophils (96, 10, 4); total cholesterol (62, 7, 3); LDL cholesterol (62, 19, 22); HDL cholesterol (62, 19, 22); hemoglobin (52, 7, 4); hematocrit, MCHC, RDW-CV, and platelets (all 96, 7, 4); D-dimer (96, 7, 13); aPTT (96, 7, 15); creatine kinase (96, 11, 4); ferritin (96, 6, 5);

transferrin (96, 6, 5); transferrin saturation (96, 6, 6); total IgG (96, 9, 3); IgG subclasses 1-4 (96, 9, 3); and TSH (96, 5, 3). Statistical significance is displayed as: \* p < 0.05; \*\* p < 0.01; \*\*\* p < 0.001.

| Laboratory value  | Comparison        | Estimate ( $\beta$ ) | 95% CI        | Standardized $\beta$ | p                   |
|-------------------|-------------------|----------------------|---------------|----------------------|---------------------|
| Hemoglobin (g/dL) | <b>NI vs. PCS</b> | 0.75                 | 0.26 – 1.25   | 0.20                 | <b>0.004**</b>      |
|                   | Recovered vs PCS  | -0.34                | -0.75 – 0.07  | -0.12                | 0.103               |
| CRP (mg/L)        | <b>NI vs. PCS</b> | 1.04                 | 0.76 – 1.93   | -0.41                | <b>&lt;0.001***</b> |
|                   | Recovered vs PCS  | -0.05                | -0.46 – 0.38  | -0.02                | 0.682               |
| Leukocytes (G/L)  | <b>NI vs. PCS</b> | -0.69                | -1.30 – -0.07 | -0.14                | <b>0.028*</b>       |
|                   | Recovered vs PCS  | -0.24                | -0.74 – 0.25  | -0.07                | 0.335               |

**Supplementary Table 5** Associations between cohort status and hemoglobin, C-reactive protein (CRP), and leukocyte counts estimated using linear regression models including NI, recovered, and PCS participants after correcting for age. PCS served as the reference category. Estimates represent beta coefficients with 95% confidence intervals. \*p < 0.05; \*\*p < 0.01; \*\*\*p < 0.001.

| Laboratory value             | Mean difference | 95% CI           | p                   |
|------------------------------|-----------------|------------------|---------------------|
| <b>Neutrophils (%)</b>       | 3.97            | 1.05 – 6.90      | <b>0.008**</b>      |
| Lymphocytes (%)              | -2.05           | - 4.66 – 0.55    | 0.122               |
| Platelets (G/L)              | 16.58           | - 2.52 – 35.69   | 0.088               |
| Ferritin ( $\mu$ g/L)        | 0.06            | -                | 0.151               |
| <b>Transferrin (mg/dL)</b>   | -16.57          | - 27.90 – - 5.24 | <b>0.004**</b>      |
| LDL cholesterol (mg/dL)      | 10.10           | - 2.32 – 22.52   | 0.110               |
| Total cholesterol (mg/dL)    | 7.65            | - 4.31 – 19.60   | 0.209               |
| IgG3 (mg/dL)                 | -0.06           | -                | 0.216               |
| <b>Creatine kinase (U/L)</b> | -0.22           | -                | <b>&lt;0.001***</b> |

**Supplementary Table 6** Group differences in laboratory values between PCS and recovered individuals were re-estimated in an age-balanced pseudo-population (ATO) using survey-weighted tests. Survey-weighted t-tests were applied for approximately normally distributed variables, and design-based rank tests were used for non-normally distributed variables (ferritin, IgG3, creatine kinase). Negative values indicate lower values in PCS than in recovered individuals \*\*p < 0.01; \*\*\*p < 0.001.

| Dependent variable vFID                  |             |              |                |                          |              |                     |
|------------------------------------------|-------------|--------------|----------------|--------------------------|--------------|---------------------|
|                                          | Estimate    | CI           | p              | Estimate (Std. $\beta$ ) | CI           | p                   |
| NI                                       | 0.39        | -0.33 – 1.11 | 0.291          | 0.37 (0.07*)             | -0.36 – 1.11 | 0.319               |
| <b>Recovered</b>                         | 1.16        | 0.43 – 1.89  | <b>0.002**</b> | 1.39 (0.25*)             | 0.62 – 2.15  | <b>&lt;0.001***</b> |
| Age                                      |             |              |                | 0.04                     | 0.01 – 0.06  | <b>0.002**</b>      |
| Art. Hypertension                        |             |              |                | -0.74                    | -2.0 – 0.5   | 0.204               |
| BMI                                      |             |              |                | 0.07                     | -0.01 – 0.2  | 0.055               |
| RR <sub>sys</sub>                        |             |              |                | -0.01                    | -0.03 – 0.01 | 0.256               |
| Observations                             | 295         |              |                | 271                      |              |                     |
| R <sup>2</sup> / R <sup>2</sup> adjusted | 0.05 / 0.04 |              |                | 0.08 / 0.06              |              |                     |

| Dependent variable CRAE |
|-------------------------|
|-------------------------|



|                                          | Estimate    | CI           | p                   | Estimate (Std. $\beta$ ) | CI            | p                   |
|------------------------------------------|-------------|--------------|---------------------|--------------------------|---------------|---------------------|
| NI                                       | 5.83        | 1.49 – 10.17 | <b>0.009**</b>      | 5.01 (0.15*)             | 0.76 – 9.26   | <b>0.021*</b>       |
| Recovered                                | 7.82        | 3.54 – 12.11 | <b>&lt;0.001***</b> | 3.52 (0.11*)             | -0.74 – 7.78  | 0.105               |
| Age                                      |             |              |                     | -0.33                    | -0.48 – -0.19 | <b>&lt;0.001***</b> |
| Art. Hypertension                        |             |              |                     | -5.59                    | -12.7 – 1.5   | 0.123               |
| BMI                                      |             |              |                     | 0.05                     | -0.39 – 0.48  | 0.834               |
| RR <sub>syst</sub>                       |             |              |                     | -0.21                    | -0.32 – -0.10 | <b>&lt;0.001***</b> |
| Observations                             | 295         |              |                     | 275                      |               |                     |
| R <sup>2</sup> / R <sup>2</sup> adjusted | 0.05 / 0.04 |              |                     | 0.21 / 0.19              |               |                     |

| Dependent variable CRVE                  |             |            |      |            |               |                     |
|------------------------------------------|-------------|------------|------|------------|---------------|---------------------|
|                                          | Estimate    | CI         | p    | Estimate   | CI            | p                   |
| NI                                       | -1.7        | -6.2 – 2.9 | 0.45 | -1.25      | -5.96 – 3.45  | 0.601               |
| Recovered                                | 4.1         | -0.4 – 8.6 | 0.08 | 0.46       | -4.35 – 5.26  | 0.852               |
| Age                                      |             |            |      | -0.30      | -0.46 – -0.14 | <b>&lt;0.001***</b> |
| Art. Hypertension                        |             |            |      | -5.14      | -12.9 – 2.65  | 0.195               |
| BMI                                      |             |            |      | 0.57       | 0.09 – 1.05   | <b>0.021*</b>       |
| RR <sub>syst</sub>                       |             |            |      | -0.11      | -0.24 – -0.01 | 0.066               |
| Observations                             | 295         |            |      | 275        |               |                     |
| R <sup>2</sup> / R <sup>2</sup> adjusted | 0.02 / 0.02 |            |      | 0.1 / 0.09 |               |                     |

| Dependent variable AVR                   |             |             |                     |                          |              |                |
|------------------------------------------|-------------|-------------|---------------------|--------------------------|--------------|----------------|
|                                          | Estimate    | CI          | p                   | Estimate (Std. $\beta$ ) | CI           | p              |
| NI                                       | 0.04        | 0.02 – 0.05 | <b>&lt;0.001***</b> | 0.03 (0.21*)             | 0.01 – 0.05  | <b>0.002**</b> |
| Recovered                                | 0.02        | 0.00 – 0.04 | <b>0.017*</b>       | 0.01 (0.10*)             | -0.01 – 0.03 | 0.167          |
| Age                                      |             |             |                     | -0.0                     | -0.00 – 0.00 | 0.241          |
| Art. Hypertension                        |             |             |                     | -0.01                    | -0.04 – 0.02 | 0.521          |
| BMI                                      |             |             |                     | -0.00                    | -0.00 – 0.00 | 0.057          |
| RR <sub>syst</sub>                       |             |             |                     | -0.00                    | -0.00 – 0.00 | <b>0.041*</b>  |
| Observations                             | 295         |             |                     | 275                      |              |                |
| R <sup>2</sup> / R <sup>2</sup> adjusted | 0.05 / 0.04 |             |                     | 0.10 / 0.08              |              |                |

**Supplementary Table 7** Multivariable linear regression models assessing associations between cohort status (NI and recovered, each compared with the reference group PCS) and RVA parameters, including vFID, CRAE, CRVE and AVR. Unadjusted models are shown in left columns. Adjusted models (right columns) additionally include age, sex, arterial hypertension, body mass index (BMI), and systolic blood pressure prior to retinal vessel analysis (RR<sub>syst</sub>). Estimates are presented as regression coefficients with 95% confidence intervals (CI). \*Standardized (Std.)  $\beta$ -coefficients are presented in brackets. Sample sizes vary across models due to missing covariate data. Model fit is summarized using R<sup>2</sup> and adjusted R<sup>2</sup>. PCS served as the reference category in all models. Significance levels are indicated as \*p < 0.05, \*\* p < 0.01 and \*\*\* p < 0.001.

| Variable | Mean Difference | 95% CI         | p-value |
|----------|-----------------|----------------|---------|
| AVR      | -0.02           | -0.04 - 0.0003 | 0.053   |

|                                       |      |              |                 |
|---------------------------------------|------|--------------|-----------------|
| <b>CRAE(<math>\mu\text{m}</math>)</b> | -5.6 | -10.3 - -0.8 | <b>0.022*</b>   |
| CRVE( $\mu\text{m}$ )                 | -2.2 | -7.0 - 2.6   | 0.36            |
| <b>vFID(%)</b>                        | -1.3 | -2.0 - -0.5  | <b>0.0012**</b> |
| aFID(%)                               | -0.4 | -1.1 - 0.2   | 0.19            |

**Supplementary Table 8** Sensitivity analysis adjusting for age using overlap weighting (ATO). Group differences in RVA parameters were re-estimated using survey-weighted t-tests in an age-balanced pseudo-population. Negative values indicate lower values in PCS than in recovered individuals. \* $p < 0.05$ ; \*\* $p < 0.01$ .

#### Post-hoc Tukey HSD comparisons for AVR between cohorts

| <i>Comparison</i>                      | <i>Adjusted p-value (post-hoc)</i> |
|----------------------------------------|------------------------------------|
| <b>PCS with ME/CFS vs. NI</b>          | <b>&lt;0.001***</b>                |
| PCS without ME/CFS vs. NI              | 0.328                              |
| Recovered vs. NI                       | 0.274                              |
| PCS without ME/CFS vs. PCS with ME/CFS | 0.131                              |
| <b>Recovered vs. PCS with ME/CFS</b>   | <b>0.010**</b>                     |
| Recovered vs. PCS without ME/CFS       | 0.987                              |

#### Post-hoc Tukey HSD comparisons for CRAE between cohorts

| <i>Comparison</i>                      | <i>Adjusted p-value (post-hoc)</i> |
|----------------------------------------|------------------------------------|
| PCS with ME/CFS vs. NI                 | 0.263                              |
| PCS without ME/CFS vs. NI              | 0.433                              |
| Recovered vs. NI                       | 0.624                              |
| PCS without ME/CFS vs. PCS with ME/CFS | 1.00                               |
| <b>Recovered vs. PCS with ME/CFS</b>   | <b>0.020*</b>                      |
| Recovered vs. PCS without ME/CFS       | 0.073                              |

#### Post-hoc Tukey HSD comparisons for vFID between cohorts

| <i>Comparison</i>                      | <i>Adjusted p-value (post-hoc)</i> |
|----------------------------------------|------------------------------------|
| PCS with ME/CFS vs. NI                 | 0.890                              |
| PCS without ME/CFS vs. NI              | 0.790                              |
| Recovered vs. NI                       | 0.140                              |
| PCS without ME/CFS vs. PCS with ME/CFS | 0.991                              |
| <b>Recovered vs. PCS with ME/CFS</b>   | <b>0.046*</b>                      |
| Recovered vs. PCS without ME/CFS       | 0.052                              |

**Supplementary Table 9** Post-hoc pairwise comparisons for RVA parameters vFID, CRAE and AVR, central between never infected (NI) controls, recovered individuals, PCS patients without ME/CFS, and PCS patients fulfilling ME/CFS criteria. Comparisons were performed following overall group differences using one-way analysis of variance with Tukey's honestly significant difference (HSD) correction for multiple testing. Adjusted p-values are reported. Statistical significance is indicated as \* $p < 0.05$ , \*\* $p < 0.01$ , and \*\*\* $p < 0.001$ .

| <i>Predictors</i>               | <b>vFID as the dependent variable</b>      |              |                |
|---------------------------------|--------------------------------------------|--------------|----------------|
|                                 | <i>Estimates (Std. <math>\beta</math>)</i> | <i>CI</i>    | <i>p</i>       |
| NI                              | 0.20 (0.03*)                               | -0.65 – 1.05 | 0.642          |
| PCS without ME/CFS              | -0.33 (-0.04*)                             | -1.36 – 0.70 | 0.519          |
| <b>Recovered</b>                | 1.26 (0.23*)                               | 0.41 – 2.11  | <b>0.004**</b> |
| <b>Age</b>                      | 0.04                                       | 0.01 – 0.06  | <b>0.004**</b> |
| Gender [male]                   | -0.38                                      | -1.11 – 0.36 | 0.314          |
| BMI                             | 0.07                                       | -0.01 – 0.15 | 0.076          |
| RR <sub>syst</sub> <sup>1</sup> | -0.01                                      | -0.03 – 0.01 | 0.466          |
| Arterial hypertension           | -0.77                                      | -2.00 – 0.45 | 0.217          |

| CRAE as the dependet variable   |                              |               |                     |
|---------------------------------|------------------------------|---------------|---------------------|
| Predictors                      | Estimates<br>(Std. $\beta$ ) | CI            | p                   |
| NI                              | 5.03 (0.14*)                 | -0.44 – 10.50 | 0.063               |
| PCS without ME/CFS              | 1.78 (0.03*)                 | -4.88 – 8.43  | 0.611               |
| Recovered                       | 3.88 (0.11*)                 | -1.57 – 9.32  | 0.156               |
| Age                             | -0.34                        | -0.50 – -0.17 | <b>&lt;0.001***</b> |
| Gender [male]                   | -1.21                        | -5.93 – 3.51  | 0.601               |
| BMI                             | 0.05                         | -0.44 – 0.54  | 0.812               |
| RR <sub>syst</sub> <sup>1</sup> | -0.22                        | -0.36 – -0.09 | <b>0.001**</b>      |
| Arterial hypertension           | -5.19                        | -13.09 – 2.71 | 0.185               |

| AVR as the dependent variable   |                              |               |                     |
|---------------------------------|------------------------------|---------------|---------------------|
| Predictors                      | Estimates<br>(Std. $\beta$ ) | CI            | p                   |
| <b>NI</b>                       | 0.04 (0.32*)                 | 0.02 – 0.07   | <b>&lt;0.001***</b> |
| <b>PCS without ME/CFS</b>       | 0.03 (0.14*)                 | 0.00 – 0.05   | <b>0.049*</b>       |
| <b>Recovered</b>                | 0.02 (0.17*)                 | 0.00 – 0.05   | <b>0.028*</b>       |
| Age                             | -0.00                        | -0.00 – 0.00  | 0.422               |
| Gender [male]                   | 0.01                         | -0.00 – 0.03  | 0.130               |
| BMI                             | -0.00                        | -0.00 – 0.00  | 0.085               |
| RR <sub>syst</sub> <sup>1</sup> | -0.00                        | -0.00 – -0.00 | <b>0.018*</b>       |
| Arterial hypertension           | -0.01                        | -0.04 – 0.02  | 0.513               |

**Supplementary Table 10** Multivariable regression analyses examining associations between cohort subgroups never-infected (NI), recovered individuals, and PCS patients without ME/CFS and RVA parameters vFID, CRAE and AVR. All models were adjusted for age, sex, body mass index (BMI), systolic blood pressure prior to retinal vessel analysis (RR<sub>syst</sub>), and arterial hypertension. Regression coefficients are presented with 95% confidence intervals (CI) and corresponding p-values. \*Standardized (Std.)  $\beta$ -coefficients are presented in brackets. The reference group is PCS patients fulfilling ME/CFS criteria. Statistical significance is indicated as \*p < 0.05, \*\*p < 0.01, and \*\*\*p < 0.001.

| Variable               | OR (95% CI)           | p-value        | AUC (95% CI)     | Biological domain        |
|------------------------|-----------------------|----------------|------------------|--------------------------|
| <b>Creatine kinase</b> | 0.996 (0.99–1.00)     | 0.12           | 0.72 (0.64–0.80) | Muscle metabolism        |
| <b>IL-6</b>            | 1.26 (1.10–1.51)      | <b>0.005**</b> | 0.70 (0.61–0.78) | Inflammation             |
| <b>CRP</b>             | 1.29 (0.46–3.38)      | 0.59           | 0.66 (0.56–0.76) | Inflammation             |
| <b>VCAM-1</b>          | 1.00006 (1.00–1.00)   | <b>0.027*</b>  | 0.65 (0.57–0.74) | Endothelial activation   |
| <b>ICAM-1</b>          | 1.0009 (1.00–1.00)    | <b>0.002**</b> | 0.65 (0.56–0.73) | Endothelial activation   |
| <b>AVR</b>             | 0.006 (0.000004–0.07) | <b>0.003**</b> | 0.62 (0.54–0.70) | Retinal microcirculation |

|                        |                   |                |                  |                          |
|------------------------|-------------------|----------------|------------------|--------------------------|
| <b>LDL cholesterol</b> | 1.01 (1.00–1.02)  | <b>0.024*</b>  | 0.62 (0.52–0.71) | Lipid metabolism         |
| <b>Transferrin</b>     | 0.99 (0.98–1.00)  | <b>0.008**</b> | 0.61 (0.53–0.69) | Iron metabolism          |
| <b>Cholesterol</b>     | 1.01 (1.00–1.02)  | <b>0.011*</b>  | 0.61 (0.52–0.69) | Lipid metabolism         |
| <b>Platelets</b>       | 1.01 (1.00–1.01)  | <b>0.009**</b> | 0.61 (0.52–0.69) | Coagulation              |
| <b>Neutrophils</b>     | 1.05 (1.01–1.09)  | <b>0.012*</b>  | 0.60 (0.53–0.69) | Inflammation             |
| <b>CRAE</b>            | 0.98 (0.96–1.00)  | <b>0.019*</b>  | 0.60 (0.52–0.68) | Retinal microcirculation |
| <b>aFID</b>            | 0.87 (0.75–1.00)  | 0.063          | 0.60 (0.51–0.69) | Retinal microcirculation |
| vFID                   | 0.90 (0.80–1.02)  | 0.10           | 0.58 (0.50–0.66) | Retinal microcirculation |
| Ferritin               | 1.00 (1.00–1.00)  | 0.59           | 0.57 (0.49–0.66) | Iron metabolism          |
| MCP-1                  | 1.01(0.99 - 1.03) | 0.070          | 0.57 (0.49–0.66) | Inflammation             |
| aPTT                   | 1.03 (0.93–1.14)  | 0.52           | 0.55 (0.46–0.64) | Cogualtion               |
| IgG3                   | 0.99 (0.97–1.01)  | 0.49           | 0.54 (0.46–0.63) | Humoral immunity         |
| IgG                    | 1.00 (1.00–1.00)  | 0.49           | 0.54 (0.46–0.63) | Humoral immunity         |
| CCL-5                  | 1.00 (1.00–1.00)  | 0.20           | 0.54 (0.45–0.63) | Inflammation             |
| TAG                    | 1.00 (1.00–1.01)  | 0.64           | 0.53 (0.44–0.63) | Lipid metabolism         |
| Hemoglobin             | 1.13 (0.91–1.42)  | 0.30           | 0.53 (0.44–0.62) | Oxygen transport         |
| Prothrombin time       | 1.00 (NA–1.00)    | 0.64           | 0.53 (0.43–0.62) | Coagulation              |
| CRVE                   | 1.00 (0.98–1.02)  | 0.81           | 0.50 (0.41–0.59) | Retinal microcirculation |

|           |                   |      |                  |              |
|-----------|-------------------|------|------------------|--------------|
| D-Dimer   | 1.00 (1.00–1.00)  | 0.26 | 0.49 (0.40–0.59) | Coagulation  |
| INR       | 0.78 (0.01–85.07) | 0.92 | 0.49 (0.41–0.57) | Coagulation  |
| CXCL-10   | 1.00 (1.00–1.00)  | 0.95 | 0.49 (0.40–0.58) | Inflammation |
| Monocytes | 0.91 (0.79–1.03)  | 0.17 | 0.45 (0.36–0.53) | Inflammation |

**Supplementary Table 11** Univariable logistic regression and receiver operating characteristic (ROC) analyses for discrimination of ME/CFS among previously infected individuals. Odds ratios (ORs) with 95% confidence intervals (CI) describe the association between each variable and ME/CFS status. Discriminatory performance is reported as area under the ROC curve (AUC) and the CI calculated using DeLong's method. For each variable the biological domain is shown. Abbreviations: IL-6, interleukin-6; CRP, C-reactive protein; ICAM-1, intercellular adhesion molecule-1; VCAM-1, vascular cell adhesion molecule-1; LDL, low-density lipoprotein cholesterol; IgG, Immunoglobulin; TAG, triglycerides; aPTT, activated partial thromboplastin time; INR, international normalized ratio; MCP-1, Monocyte chemoattractant protein-1, CCL-5, C-C motif chemokine ligand 5; CXCL-10, C-X-C motif chemokine ligand 10; IL6, ICAM-1, VCAM-1, MCP-1, CCL-5, CXCL-10 all n=190, Statistical significance is indicated as \*p < 0.05, \*\*p < 0.01, and \*\*\*p < 0.001.

|                       | Predictor | Estimate | 95% CI             | p-value             |
|-----------------------|-----------|----------|--------------------|---------------------|
| <b>VCAM-1 (pg/mL)</b> | Recovered | -2319.6  | -3265.5 to -1373.7 | <b>&lt;0.001***</b> |
| <b>ICAM-1 (pg/mL)</b> | Recovered | -358.9   | -529.2 to -188.6   | <b>&lt;0.001***</b> |
| IL-6 (pg/mL)          | Recovered | -0.24    | -0.56 to 0.08      | 0.14                |
| MCP-1 (pg/mL)         | Recovered | -3.52    | -7.87 to 0.84      | 0.11                |

**Supplementary Table 12** Values are regression coefficients with 95% confidence intervals derived from robust linear regression models (M-estimation). Models were adjusted for age. The reference cohort is the "recovered cohort". Significance levels: \*\*\*p < 0.001

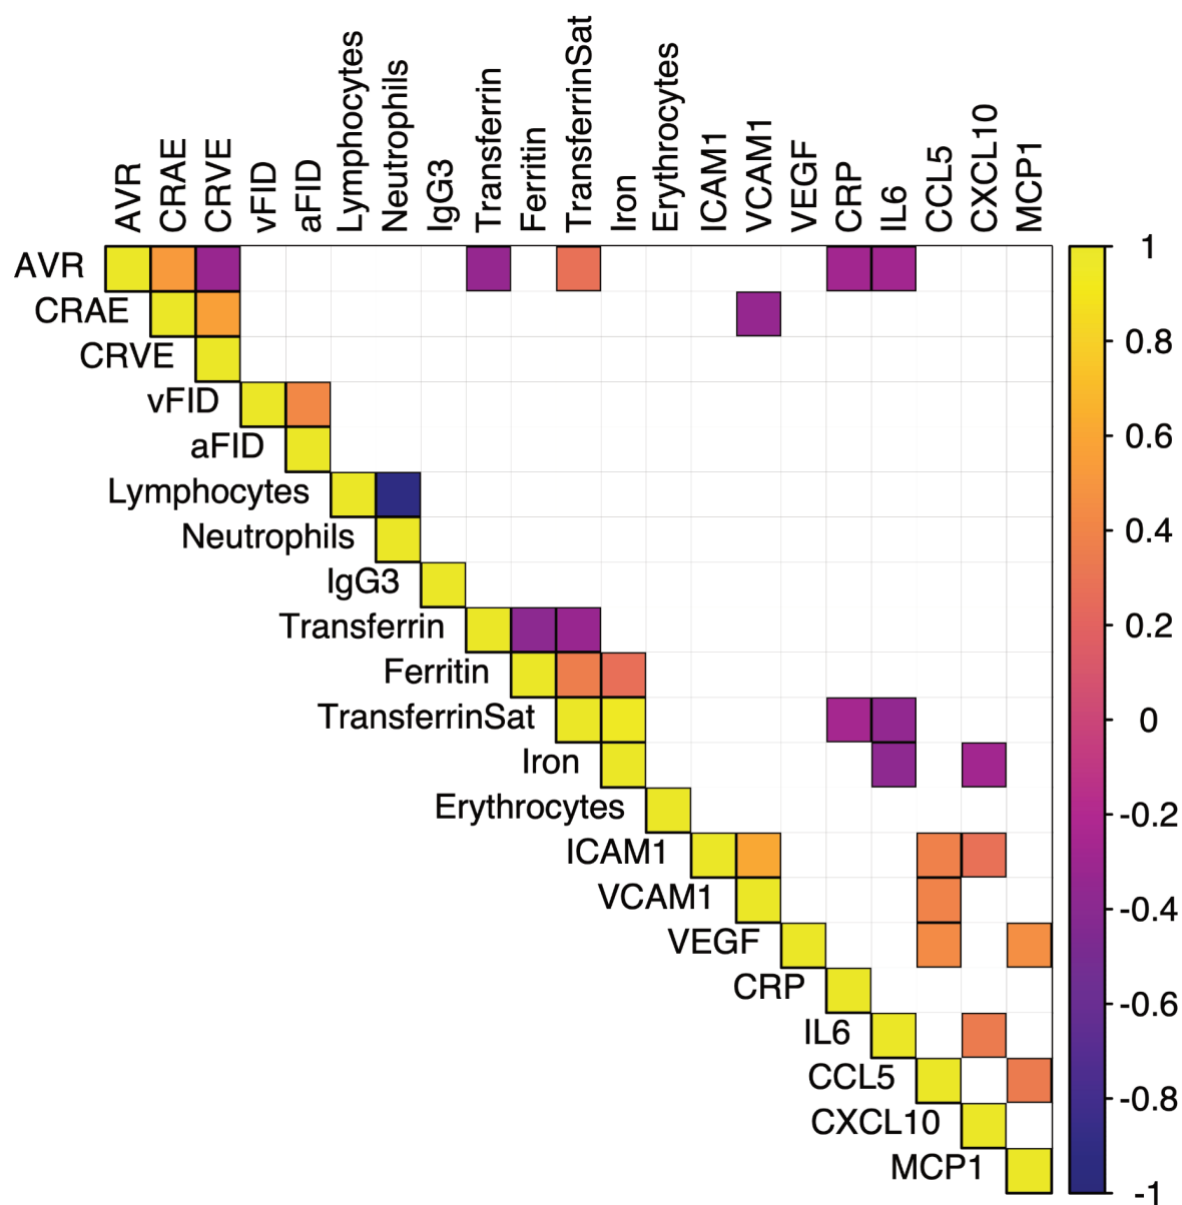

**Supplemental Figure 1** Spearman correlation heatmap between selected laboratory parameters and RVA metrics in PCS patients. Significant correlations ( $p < 0.05$ ) after Benjamini–Hochberg FDR correction are shown. Spearman's  $\rho$  ranges from +1 (yellow) to -1 (blue).
